# Supplementary material for: Investigations into the In Vitro Metabolism of hGH and IGF-I Employing Stable-Isotope-Labelled Drugs and Monitoring Diagnostic Immonium Ions by High-Resolution/High-Accuracy Mass Spectrometry
Source: MDPI journal article supplement (doi:10.3390/metabo12020146), 2022-02-04
Supplement: s1 [file s1]

# Investigations into the *in vitro* metabolism of hGH and IGF-I employing stable-isotope labelled drugs and monitoring diagnostic immonium ions by high resolution/high accuracy mass spectrometry

## Supplemental Information

Sophia Krombholz <sup>1</sup>, Andreas Thomas <sup>1\*</sup> and Mario Thevis <sup>1,2</sup>

<sup>1</sup> Institute of Biochemistry/Center for Preventive Doping Research, German Sports University Cologne, Am Sportpark Müngersdorf 6, 50933 Cologne, Germany

<sup>2</sup> European Monitoring Center for Emerging Doping Agents (EuMoCEDA), Cologne/Bonn, Germany

|                                                                                                                       |   |
|-----------------------------------------------------------------------------------------------------------------------|---|
| <b>Figure S 1:</b> Product ion mass spectrum of hGH 135-142 (m/z 922.4993); NCE: 25 % .....                           | 2 |
| <b>Figure S 2:</b> Product ion mass spectrum of hGH 135-143 (m/z 1085.56263); NCE: 26 % .....                         | 2 |
| <b>Figure S 3:</b> Product ion mass spectrum of hGH 34-44 (m/z 687-3586); NCE: 22 % .....                             | 2 |
| <b>Figure S 4:</b> Product ion mass spectrum of hGH 125-139 (m/z 832-4147); NCE: 30 % .....                           | 3 |
| <b>Figure S 5:</b> Product ion mass spectrum of hGH 29-41 (m/z 811-3909); NCE: 25 %; *pE: pyroglutamate .....         | 3 |
| <b>Figure S 6:</b> Product ion mass spectrum of hGH 9-16 (m/z 979.5030); NCE: 35 % .....                              | 3 |
| <b>Figure S 7:</b> Product ion mass spectrum of hGH 86-91 (m/z 771.4036); NCE: 22 % .....                             | 4 |
| <b>Figure S 8:</b> Product ion mass spectrum of hGH 102-113 (m/z 1302.5848); NCE: 22 % .....                          | 4 |
| <b>Figure S 9:</b> Product ion mass spectrum of hGH 114-124 (m/z 629.8481); NCE: 22 % .....                           | 4 |
| <b>Figure S 10:</b> Product ion mass spectrum of hGH 29-38 (m/z 1236.5783); NCE: 25 % .....                           | 5 |
| <b>Figure S 11:</b> Product ion mass spectrum of hGH 86-92 (m/z 918.4720); NCE: 22 % .....                            | 5 |
| <b>Figure S 12:</b> Product ion mass spectrum of hGH 1-13 (m/z 745.9037); NCE: 23 % .....                             | 5 |
| <b>Figure S 13:</b> Product ion mass spectrum of hGH 1-16 (m/z 631.0135); NCE: 22 % .....                             | 6 |
| <b>Figure S 14:</b> Product ion mass spectrum of IGF 25-36 (m/z 650.8177); NCE: 24 % .....                            | 6 |
| <b>Figure S 15:</b> Product ion mass spectrum of IGF 25-35 (m/z 572.7671); NCE: 24 % .....                            | 6 |
| <b>Figure S 16:</b> Product ion mass spectrum of IGF 24-31 (m/z 989.4727); NCE: 25 % .....                            | 7 |
| <b>Figure S 17:</b> Product ion mass spectrum of IGF 22-36 (m/z 834.3943); NCE: 27 % .....                            | 7 |
| <b>Figure S 18:</b> Product ion mass spectrum of IGF 4-70 (m/z 921.0660); NCE: 30 % .....                             | 7 |
| <b>Figure S 19:</b> Product ion mass spectrum of IGF 3-36(m/z 922.1817); NCE: 25 % .....                              | 8 |
| <b>Figure S 20:</b> Product ion mass spectrum of IGF 3-35 after reduction with TCEP (m/z 1177.8781); NCE: 25 % .....  | 8 |
| <b>Figure S 21:</b> Product ion mass spectrum of IGF 3-31 after reduction with TCEP (m/z 1071.8387); NCE: 25 % .....  | 8 |
| <b>Figure S 22:</b> Product ion mass spectrum of IGF 3-24 after reduction with TCEP (m/z 1203.55901); NCE: 25 % ..... | 9 |

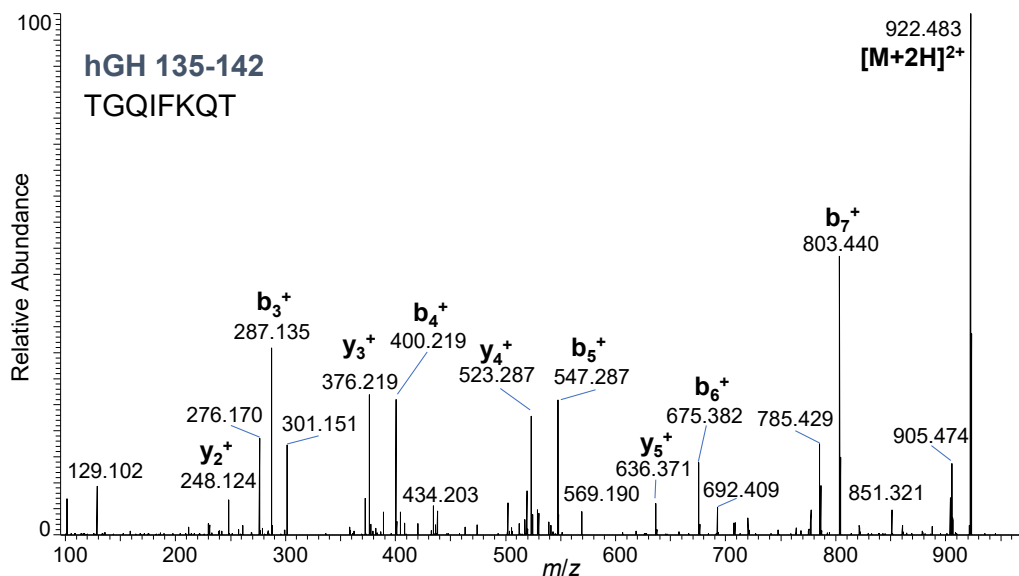

**Figure S 1:** Product ion mass spectrum of hGH 135-142 ( $m/z$  922.4993); NCE: 25 %

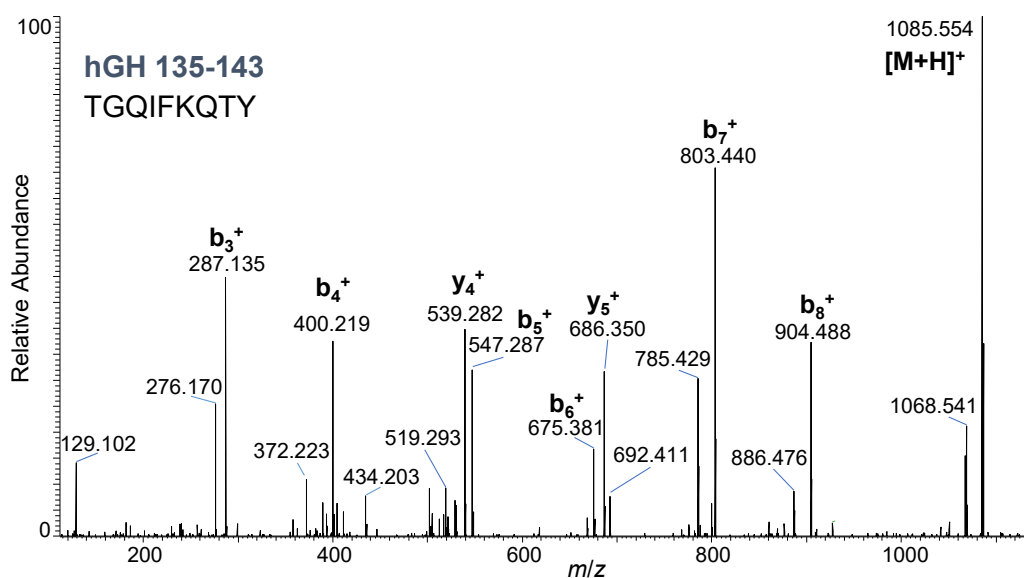

**Figure S 2:** Product ion mass spectrum of hGH 135-143 ( $m/z$  1085.56263); NCE: 26 %

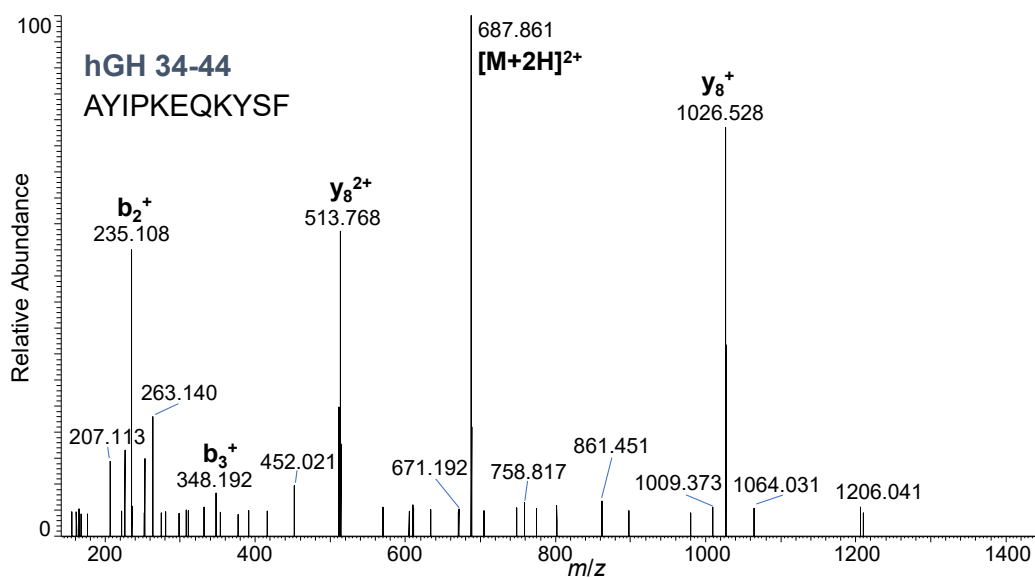

**Figure S 3:** Product ion mass spectrum of hGH 34-44 ( $m/z$  687-3586); NCE: 22 %

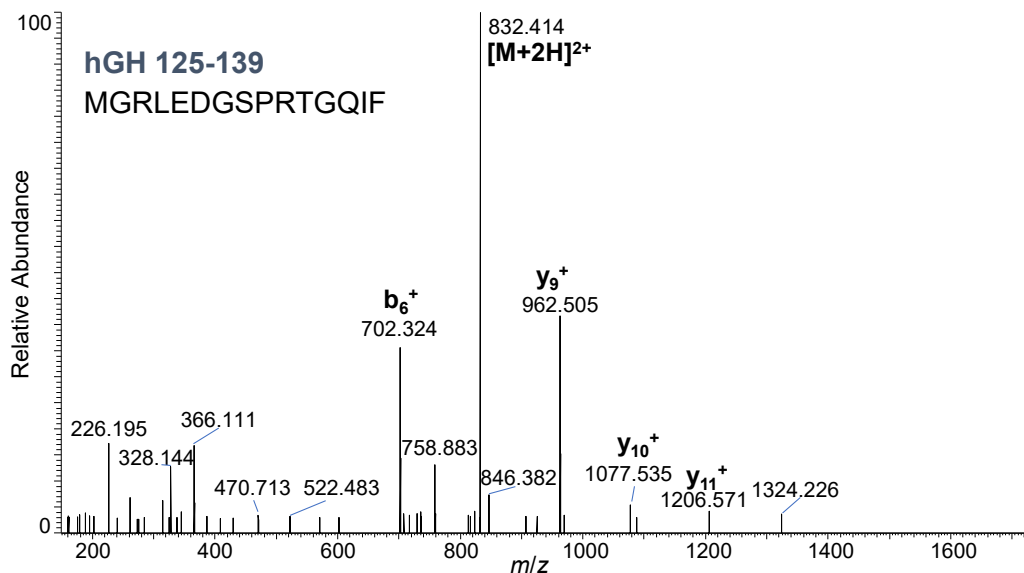

**Figure S 4:** Product ion mass spectrum of hGH 125-139 ( $m/z$  832-4147); NCE: 30 %

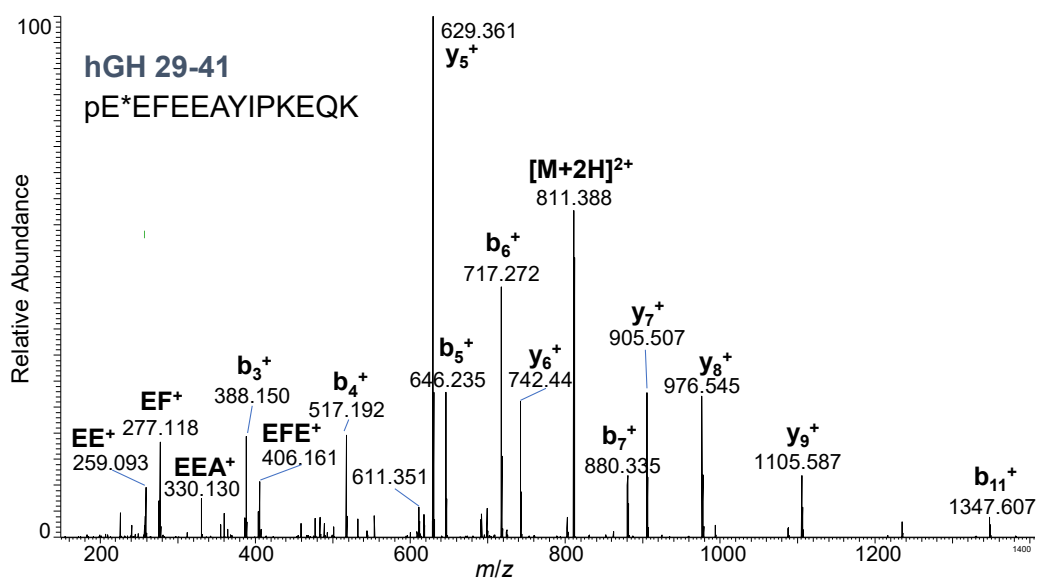

**Figure S 5:** Product ion mass spectrum of hGH 29-41 ( $m/z$  811-3909); NCE: 25 %; \*pE: pyroglutamate

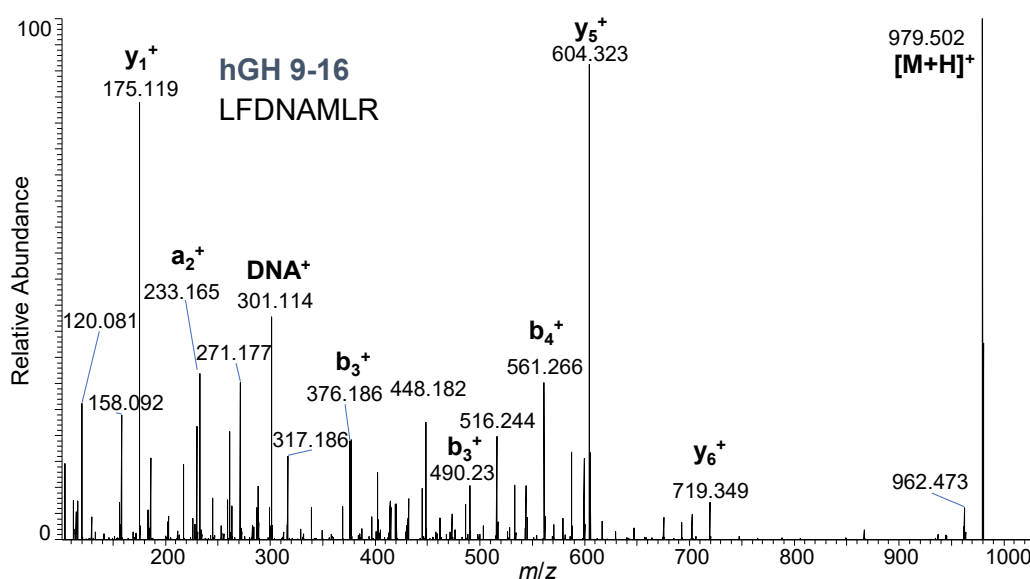

**Figure S 6:** Product ion mass spectrum of hGH 9-16 ( $m/z$  979.5030); NCE: 35 %

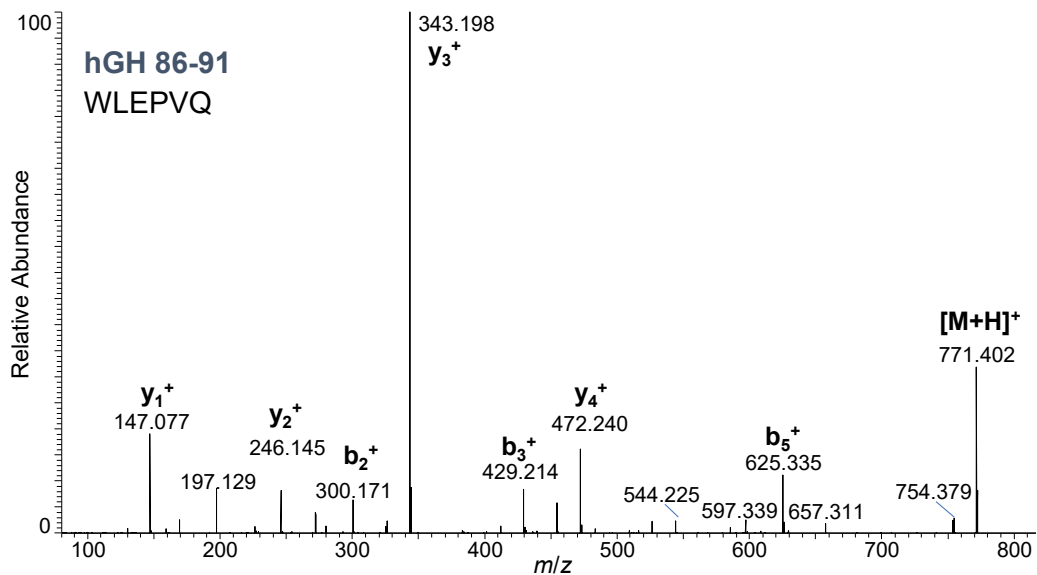

**Figure S 7:** Product ion mass spectrum of hGH 86-91 ( $m/z$  771.4036); NCE: 22 %

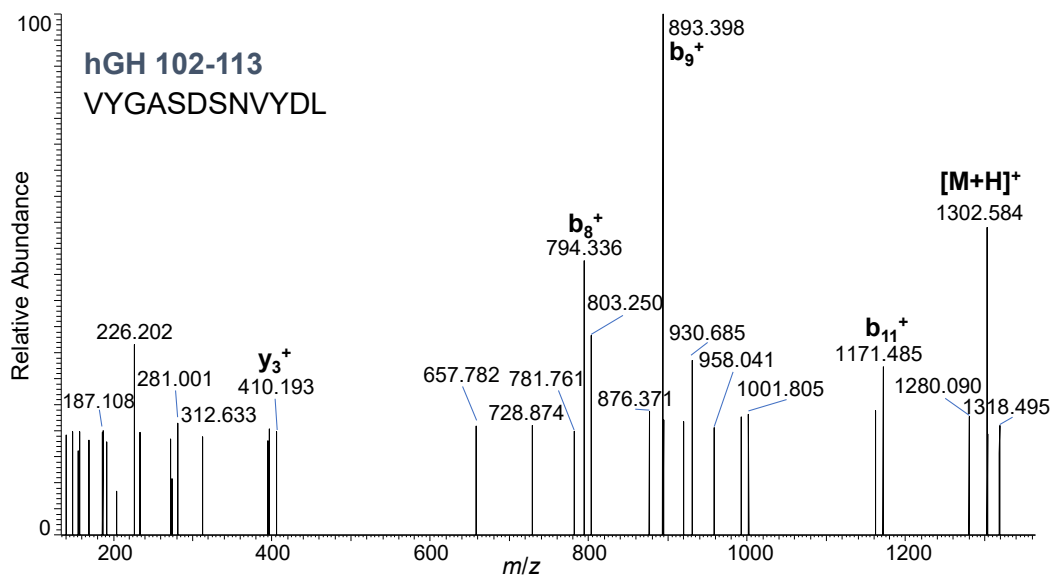

**Figure S 8:** Product ion mass spectrum of hGH 102-113 ( $m/z$  1302.5848); NCE: 22 %

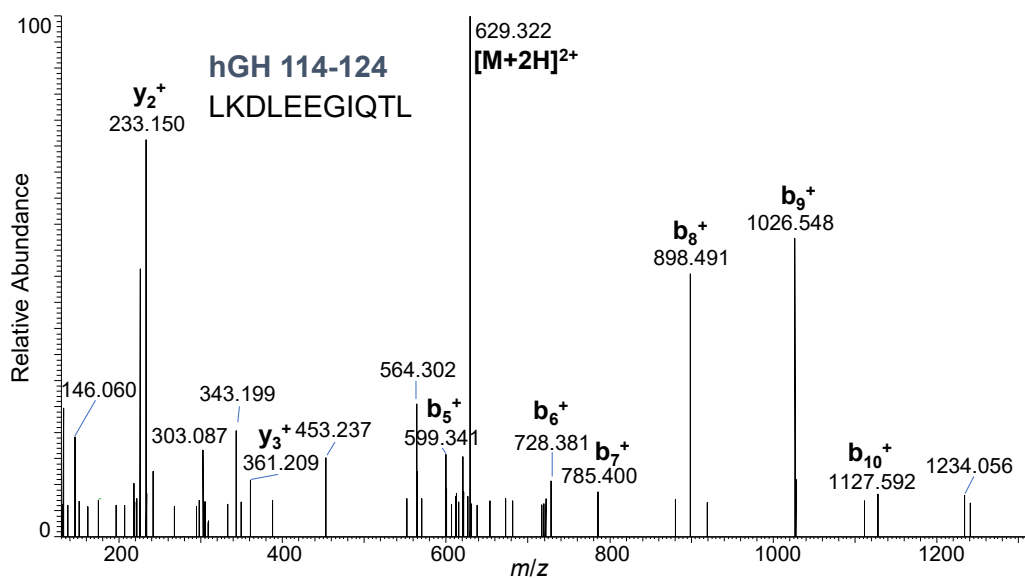

**Figure S 9:** Product ion mass spectrum of hGH 114-124 ( $m/z$  629.8481); NCE: 22 %

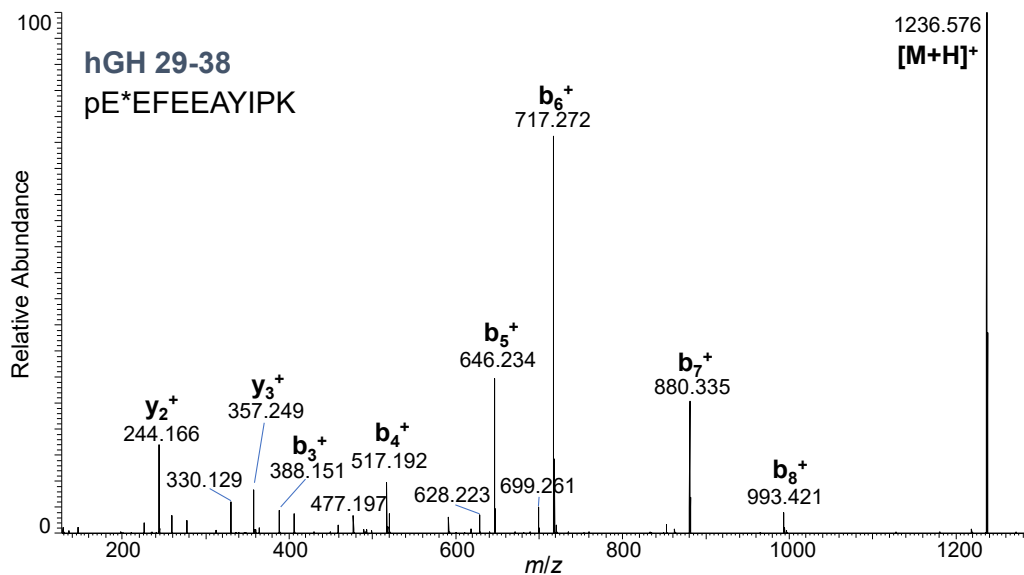

**Figure S 10:** Product ion mass spectrum of hGH 29-38 ( $m/z$  1236.5783); NCE: 25 %

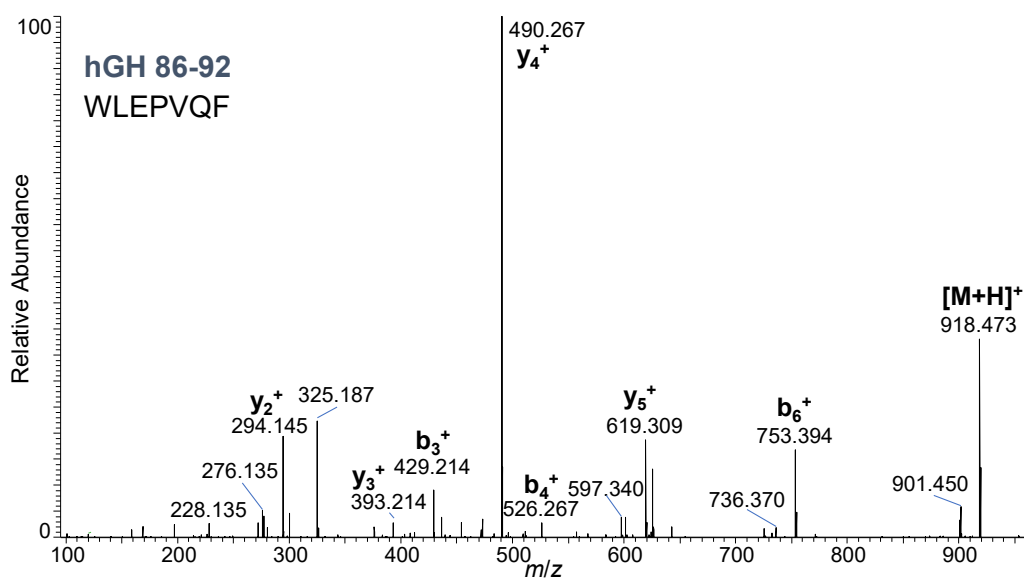

**Figure S 11:** Product ion mass spectrum of hGH 86-92 ( $m/z$  918.4720); NCE: 22 %

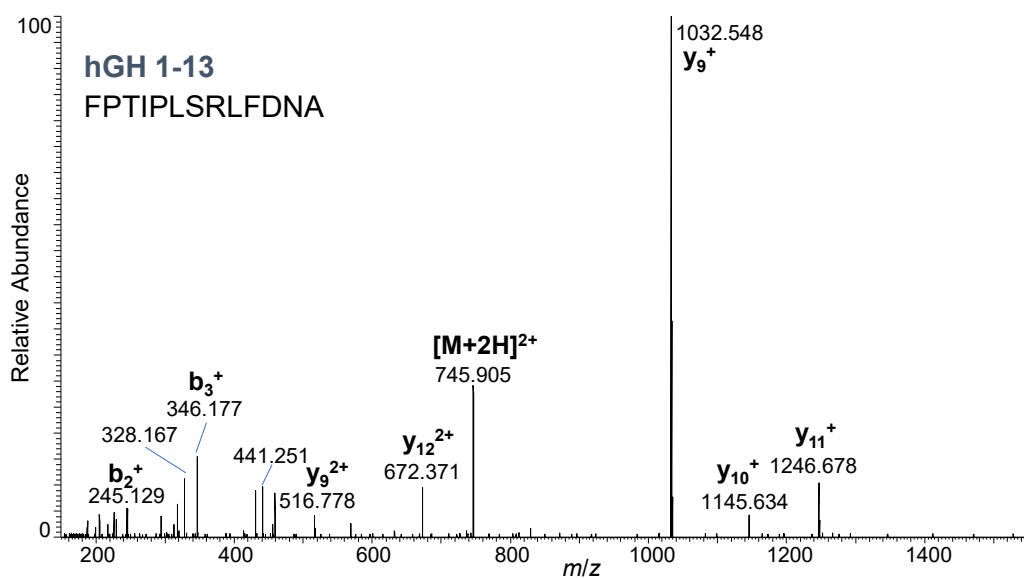

**Figure S 12:** Product ion mass spectrum of hGH 1-13 ( $m/z$  745.9037); NCE: 23 %

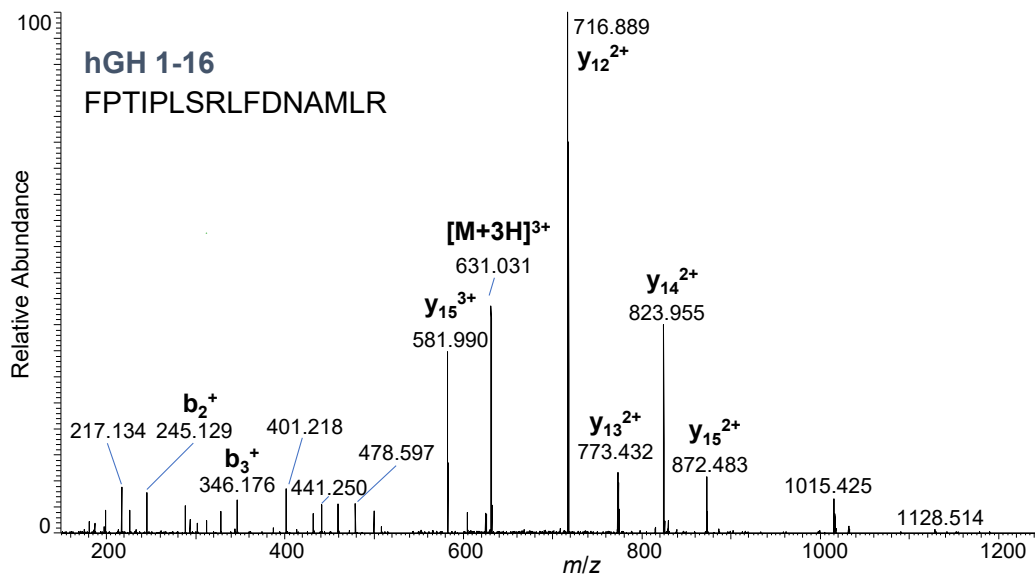

**Figure S 13:** Product ion mass spectrum of hGH 1-16 ( $m/z$  631.0135); NCE: 22 %

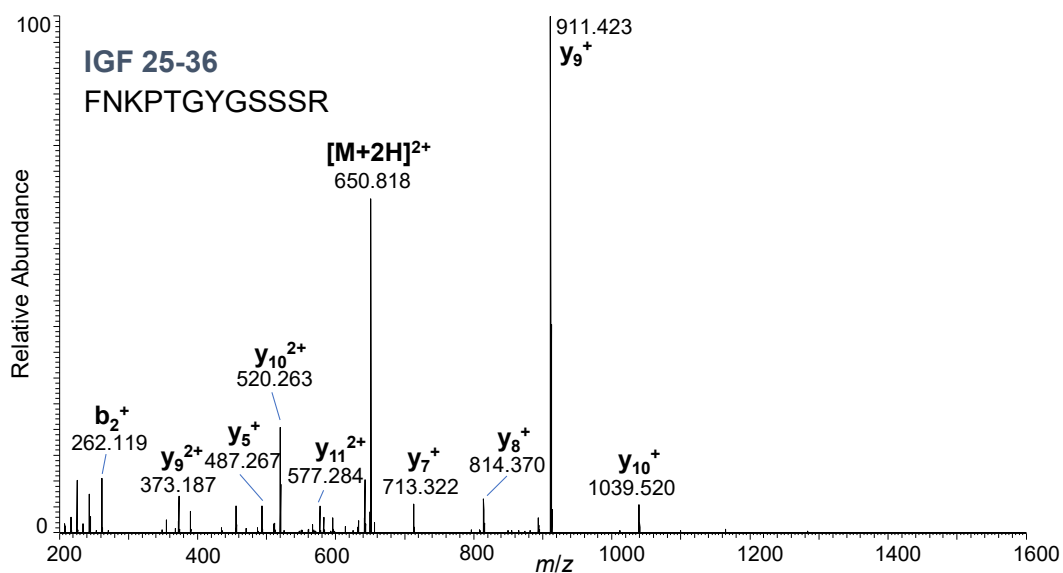

**Figure S 14:** Product ion mass spectrum of IGF 25-36 ( $m/z$  650.8177); NCE: 24 %

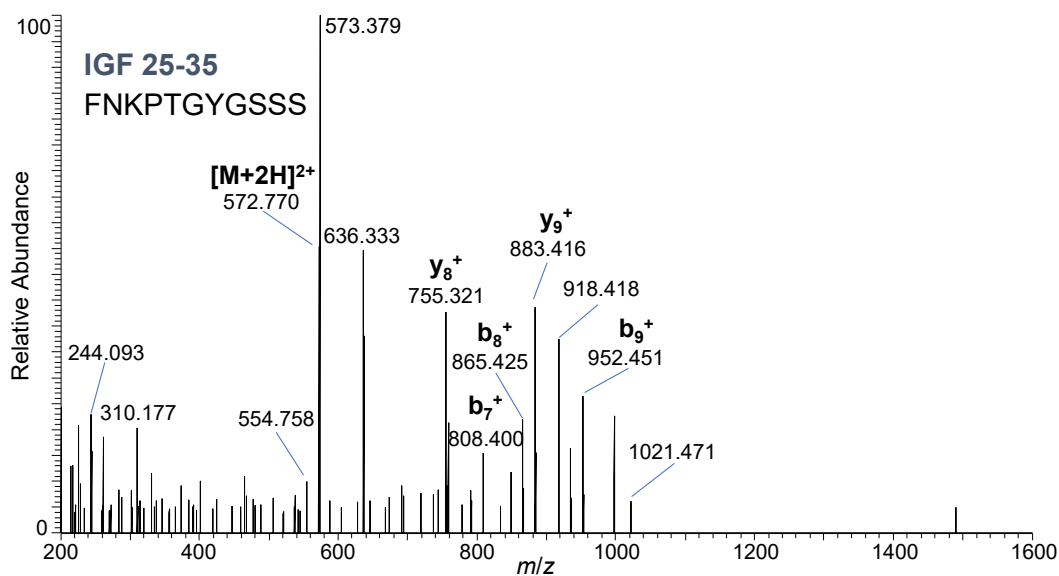

**Figure S 15:** Product ion mass spectrum of IGF 25-35 ( $m/z$  572.7671); NCE: 24 %

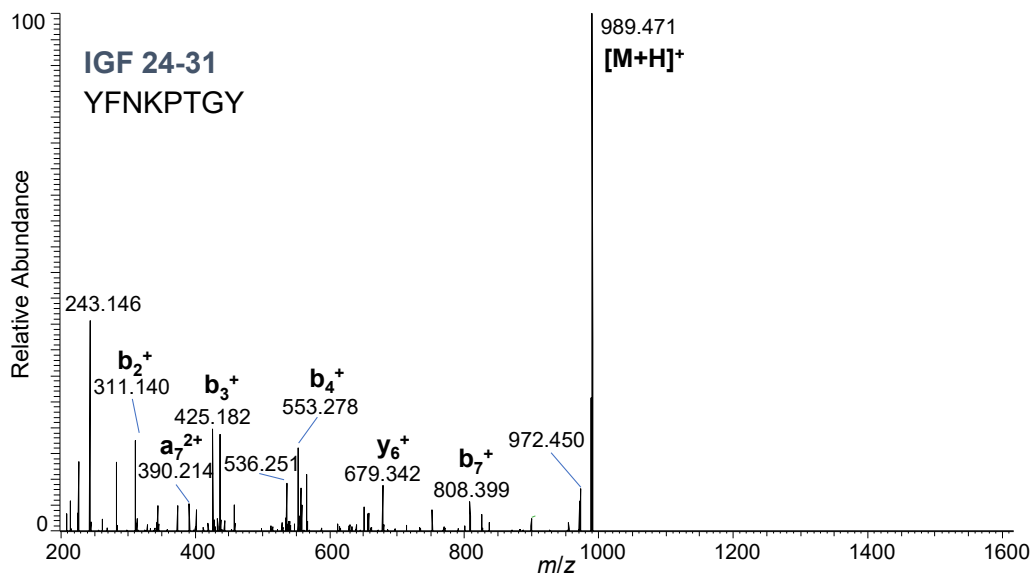

**Figure S 16:** Product ion mass spectrum of IGF 24-31 ( $m/z$  989.4727); NCE: 25 %

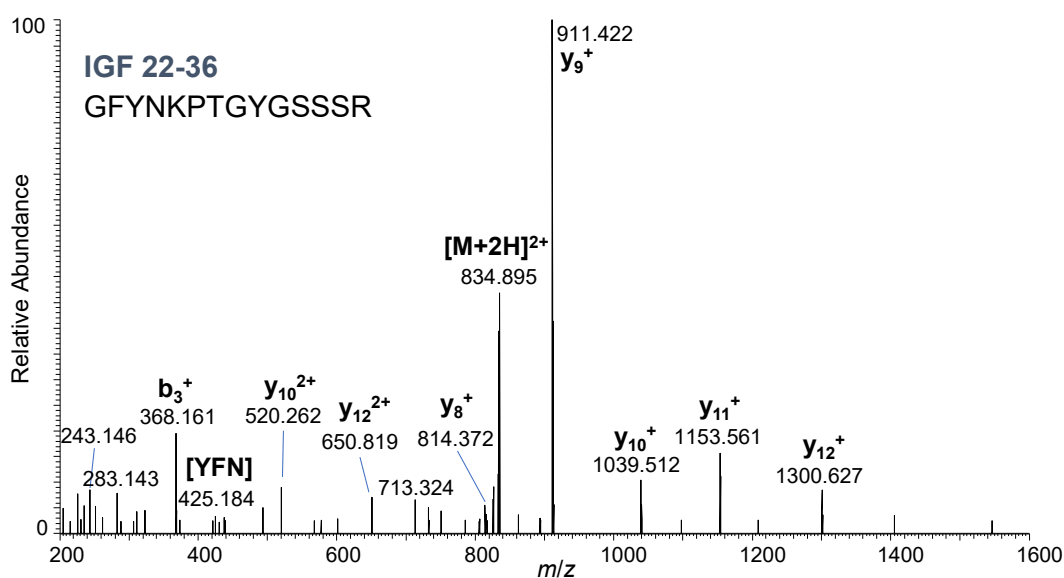

**Figure S 17:** Product ion mass spectrum of IGF 22-36 ( $m/z$  834.3943); NCE: 27 %

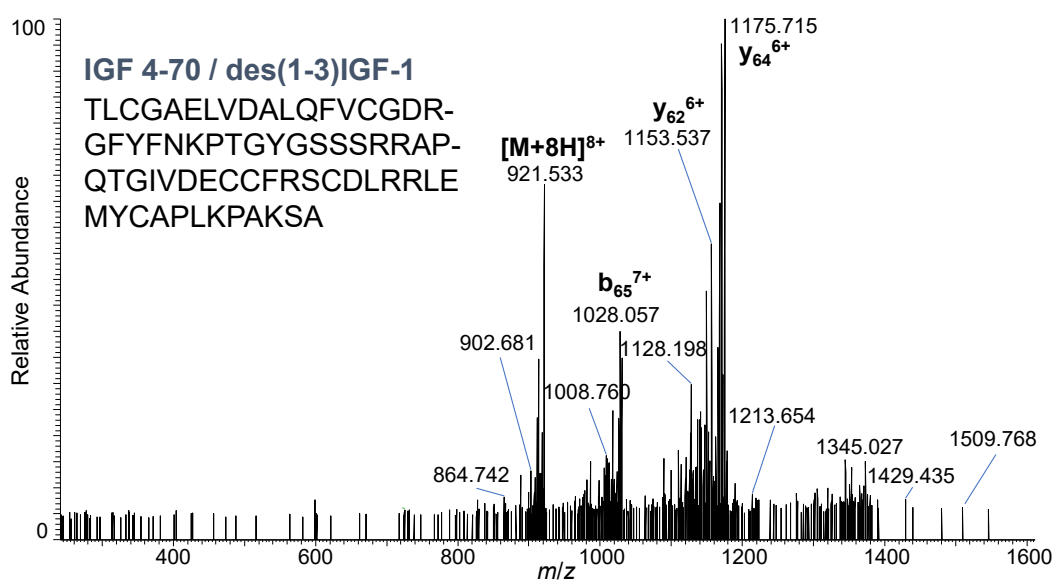

**Figure S 18:** Product ion mass spectrum of IGF 4-70 ( $m/z$  921.0660); NCE: 30 %

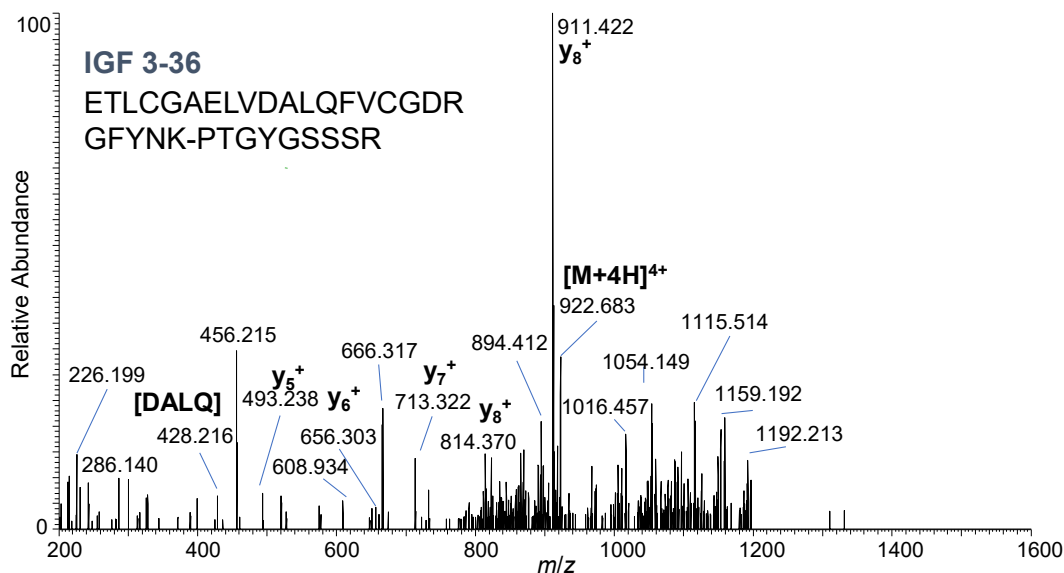

**Figure S 19:** Product ion mass spectrum of IGF 3-36 ( $m/z$  922.1817); NCE: 25 %

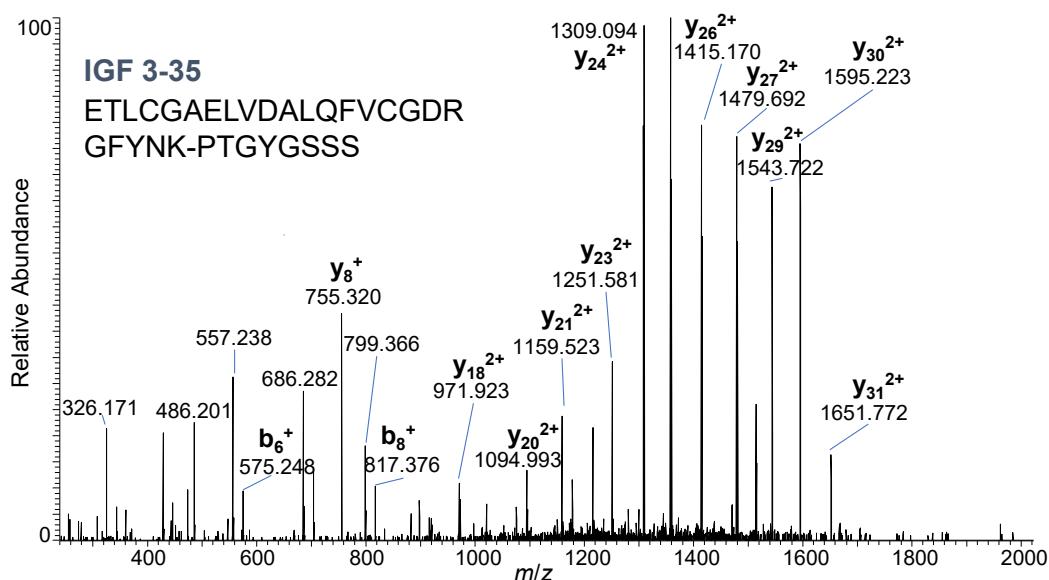

**Figure S 20:** Product ion mass spectrum of IGF 3-35 after reduction with TCEP ( $m/z$  1177.8781); NCE: 25 %

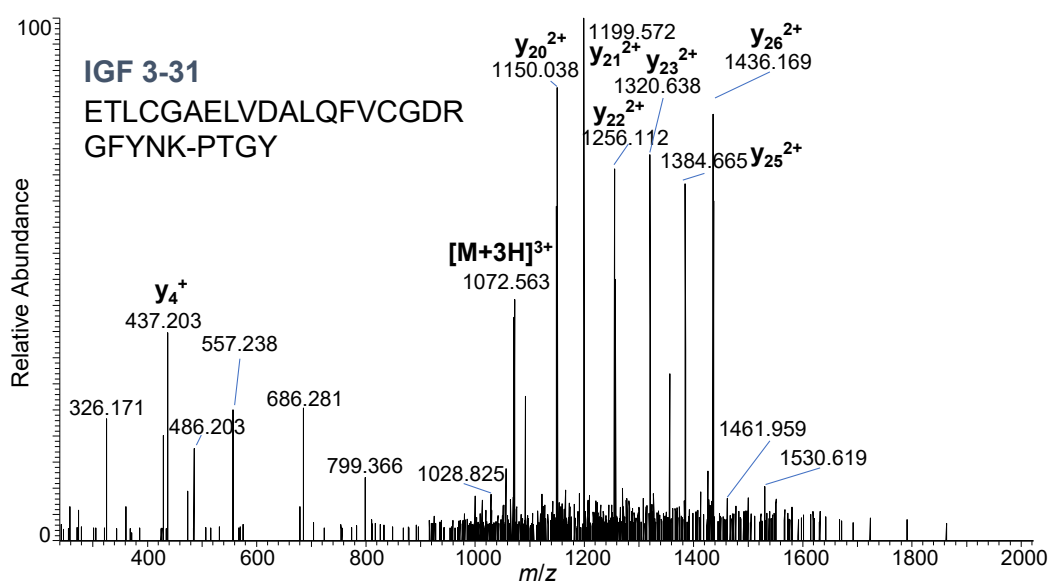

**Figure S 21:** Product ion mass spectrum of IGF 3-31 after reduction with TCEP ( $m/z$  1071.8387); NCE: 25 %

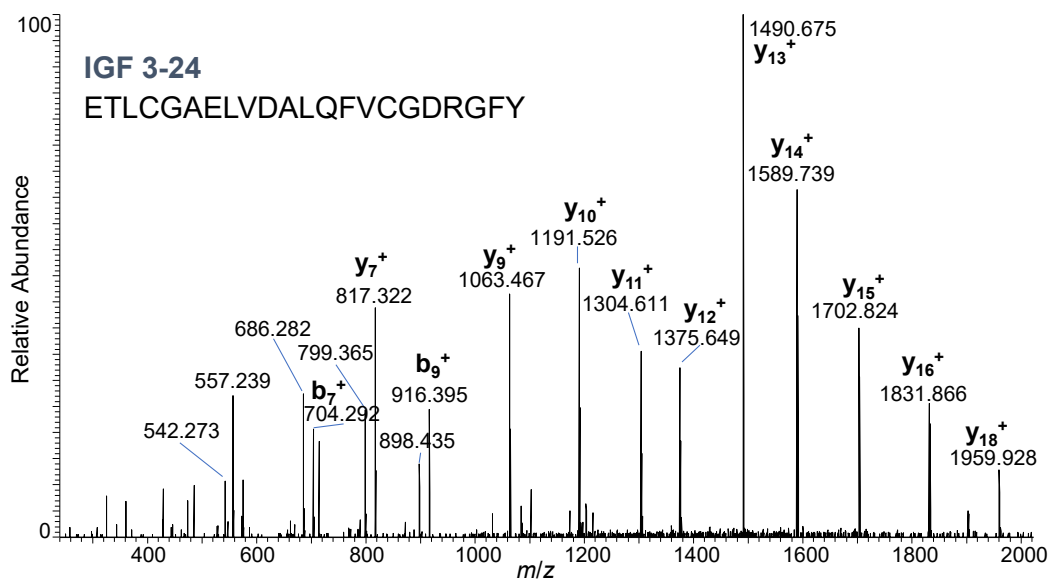

**Figure S 22:** Product ion mass spectrum of IGF 3-24 after reduction with TCEP ( $m/z$  1203.55901); NCE: 25 %
